# Supplementary material
Source: PubMed Central journal article supplement (PMC7190416)
Supplement: NIHMS1541781-supplement-1.pdf [file NIHMS1541781-supplement-1.pdf]

Table S1

*Descriptive Information on Manifest Variables*

|      | SCT   | IN    | HI    | ODD   | ANX   | DEP   | SLP   | SHY   | FRD   | #FR   | SI   | AI   | TM   | SO   | SR   | SM   | ER   |
|------|-------|-------|-------|-------|-------|-------|-------|-------|-------|-------|------|------|------|------|------|------|------|
| SCT  | 1.00  |       |       |       |       |       |       |       |       |       |      |      |      |      |      |      |      |
| IN   | 0.72  | 1.00  |       |       |       |       |       |       |       |       |      |      |      |      |      |      |      |
| HI   | 0.53  | 0.76  | 1.00  |       |       |       |       |       |       |       |      |      |      |      |      |      |      |
| ODD  | 0.52  | 0.70  | 0.71  | 1.00  |       |       |       |       |       |       |      |      |      |      |      |      |      |
| ANX  | 0.63  | 0.57  | 0.50  | 0.51  | 1.00  |       |       |       |       |       |      |      |      |      |      |      |      |
| DEP  | 0.66  | 0.57  | 0.44  | 0.54  | 0.69  | 1.00  |       |       |       |       |      |      |      |      |      |      |      |
| SLP  | 0.40  | 0.36  | 0.29  | 0.39  | 0.39  | 0.44  | 1.00  |       |       |       |      |      |      |      |      |      |      |
| SHY  | 0.40  | 0.30  | 0.20  | 0.25  | 0.50  | 0.44  | 0.32  | 1.00  |       |       |      |      |      |      |      |      |      |
| FRD  | 0.52  | 0.51  | 0.44  | 0.45  | 0.53  | 0.56  | 0.37  | 0.60  | 1.00  |       |      |      |      |      |      |      |      |
| #FR  | -0.29 | -0.30 | -0.25 | -0.24 | -0.28 | -0.27 | -0.22 | -0.40 | -0.50 | 1.00  |      |      |      |      |      |      |      |
| SI   | 0.35  | 0.40  | 0.33  | 0.43  | 0.32  | 0.33  | 0.31  | 0.37  | 0.43  | -0.38 | 1.00 |      |      |      |      |      |      |
| AI   | 0.38  | 0.50  | 0.36  | 0.35  | 0.26  | 0.25  | 0.30  | 0.21  | 0.32  | -0.32 | 0.53 | 1.00 |      |      |      |      |      |
| TM   | 0.54  | 0.73  | 0.57  | 0.58  | 0.42  | 0.42  | 0.36  | 0.27  | 0.45  | -0.26 | 0.35 | 0.45 | 1.00 |      |      |      |      |
| SO   | 0.64  | 0.66  | 0.53  | 0.48  | 0.48  | 0.46  | 0.35  | 0.38  | 0.49  | -0.32 | 0.39 | 0.52 | 0.63 | 1.00 |      |      |      |
| SR   | 0.50  | 0.69  | 0.69  | 0.69  | 0.41  | 0.42  | 0.35  | 0.23  | 0.45  | -0.27 | 0.40 | 0.43 | 0.67 | 0.64 | 1.00 |      |      |
| SM   | 0.55  | 0.71  | 0.55  | 0.61  | 0.43  | 0.48  | 0.39  | 0.29  | 0.48  | -0.28 | 0.39 | 0.51 | 0.75 | 0.63 | 0.70 | 1.00 |      |
| ER   | 0.47  | 0.60  | 0.57  | 0.67  | 0.49  | 0.45  | 0.37  | 0.33  | 0.48  | -0.28 | 0.41 | 0.36 | 0.59 | 0.57 | 0.68 | 0.61 | 1.00 |
| Mean | 0.97  | 1.46  | 1.42  | 1.29  | 0.91  | 0.56  | 1.10  | 1.24  | 0.91  | 2.98  | 2.20 | 2.28 | 1.20 | 0.75 | 1.04 | 0.94 | 0.94 |
| SD   | 0.86  | 1.28  | 1.24  | 1.24  | 0.94  | 0.82  | 0.63  | 0.87  | 0.94  | 1.44  | 1.35 | 1.54 | 0.88 | 0.82 | 0.90 | 0.86 | 0.94 |

*Note.*  $N = 2056$ . SCT=sluggish cognitive tempo (0-5), IN=inattention (0-5), HI=hyperactivity/impulsivity, (0-5), ODD=oppositional defiant disorder (0-5), ANX=anxiety (0-5), DEP=depression (0-5), SLP=sleep difficulties (0-4), SHY= conflicted shyness (0-4), FRD=friendship difficulties (0-4), #FR= number of friends (0-5), SI=social impairment (0-6), AI=academic impairment (0-6), TM=time management (0-3), SO=self-organization (0-3), SR=self-restraint (0-3), SM=self-motivation (0-3), and ER=emotion regulation (0-3).

Table S2

*Standardized Primary and Secondary Loadings (Standard Errors) of Sluggish Cognitive Tempo (SCT), ADHD Inattention (IN), and ADHD-Hyperactivity/Impulsivity (HI) Symptoms on SCT, ADHD-IN, ADHD-HI Factors*

| Symptoms                                                     | SCT                      | ADHD-IN                  | ADHD-HI                  |
|--------------------------------------------------------------|--------------------------|--------------------------|--------------------------|
| <b>SCT Symptoms</b>                                          |                          |                          |                          |
| 1. Behavior is slow (e.g., sluggish)                         | <b>.65</b> (.03)         | .14 (.03)                | -.19 (.03)               |
| 2. Lost in a fog                                             | <b>.84</b> (.02)         | -.07 (.03) <sup>ns</sup> | .03 (.02) <sup>ns</sup>  |
| 3. Stares blankly into space                                 | <b>.94</b> (.02)         | -.28 (.03)               | .15 (.02)                |
| 4. Drowsy or sleepy (yawns) during the day                   | <b>.75</b> (.02)         | -.13 (.03)               | -.10 (.03)               |
| 5. Daydreams                                                 | <b>.83</b> (.02)         | -.31 (.03)               | .20 (.02)                |
| 6. Loses train of thought                                    | <b>.64</b> (.02)         | .08 (.03) <sup>ns</sup>  | .19 (.02)                |
| 7. Low level of activity (e.g., underactive)                 | <b>.69</b> (.03)         | .21 (.03)                | -.38 (.03)               |
| 8. Gets lost in own thoughts                                 | <b>.82</b> (.02)         | -.13 (.03)               | .15 (.02)                |
| 9. Easily tired or fatigued                                  | <b>.80</b> (.02)         | .09 (.03) <sup>ns</sup>  | -.28 (.02)               |
| 10. Forgets what is going to say                             | <b>.68</b> (.02)         | .05 (.03) <sup>ns</sup>  | .08 (.02) <sup>ns</sup>  |
| 11. Easily confused                                          | <b>.75</b> (.02)         | .15 (.03)                | -.01 (.02) <sup>ns</sup> |
| 12. Spaces or zones out                                      | <b>.88</b> (.02)         | -.10 (.02)               | .12 (.02)                |
| 13. Gets mixed up                                            | <b>.76</b> (.02)         | .12 (.03)                | .02 (.02) <sup>ns</sup>  |
| 14. Thinking is slow                                         | <b>.70</b> (.02)         | .26 (.03)                | -.14 (.02)               |
| 15. Difficulty expressing thoughts (e.g. gets “tongue tied”) | <b>.60</b> (.02)         | .21 (.03)                | .02 (.02) <sup>ns</sup>  |
| <b>ADHD-Inattention Symptoms</b>                             |                          |                          |                          |
| 1. Close attention to details                                | .07 (.02)                | <b>.81</b> (.02)         | .02 (.02) <sup>ns</sup>  |
| 2. Sustaining attention                                      | .10 (.02)                | <b>.73</b> (.02)         | .15 (.02)                |
| 3. Listening when spoken to directly                         | .04 (.02) <sup>ns</sup>  | <b>.69</b> (.02)         | .20 (.02)                |
| 4. Follow through on instructions                            | .00 (.02) <sup>ns</sup>  | <b>.85</b> (.02)         | .11 (.02)                |
| 5. Organizational skills                                     | -.02 (.02) <sup>ns</sup> | <b>.89</b> (.02)         | .00 (.02) <sup>ns</sup>  |
| 6. Avoids tasks requiring sustained effort                   | .13 (.02)                | <b>.72</b> (.02)         | .06 (.02) <sup>ns</sup>  |
| 7. Loses things                                              | .02 (.02) <sup>ns</sup>  | <b>.76</b> (.02)         | .07 (.02)                |
| 8. Easily distracted                                         | .08 (.02) <sup>ns</sup>  | <b>.68</b> (.02)         | .22 (.02)                |
| 9. Forgetful                                                 | .14 (.02)                | <b>.73</b> (.02)         | .10 (.02)                |
| <b>ADHD-Hyperactive/Impulsive Symptoms</b>                   |                          |                          |                          |
| 1. Fidgets/squirms                                           | .07 (.02) <sup>ns</sup>  | .25 (.03)                | <b>.57</b> (.02)         |
| 2. Leaves seat                                               | .06 (.02) <sup>ns</sup>  | .21 (.02)                | <b>.67</b> (.02)         |
| 3. Runs/climbs                                               | .00 (.02) <sup>ns</sup>  | .13 (.03)                | <b>.78</b> (.02)         |
| 4. Difficulty playing quietly                                | -.02 (.02) <sup>ns</sup> | .12 (.02)                | <b>.79</b> (.02)         |
| 5. Talks excessively                                         | .04 (.02) <sup>ns</sup>  | .06 (.02) <sup>ns</sup>  | <b>.78</b> (.02)         |
| 6. Driven/on the go                                          | -.04 (.02) <sup>ns</sup> | .02 (.03) <sup>ns</sup>  | <b>.76</b> (.02)         |
| 7. Blurts                                                    | .09 (.02)                | .00 (.03) <sup>ns</sup>  | <b>.77</b> (.02)         |
| 8. Difficulty awaiting turn                                  | .08 (.02)                | .03 (.02) <sup>ns</sup>  | <b>.82</b> (.02)         |
| 9. Interrupts/intrudes                                       | .04 (.02) <sup>ns</sup>  | .10 (.02)                | <b>.77</b> (.02)         |

*Note.*  $N = 2056$ . The wording of the SCT items is the same as the scale. The wording of the ADHD-IN and ADHD-HI items is reduced for the table (complete wording available from authors). SCT = sluggish cognitive tempo. ADHD-HI = attention-deficit/hyperactivity disorder-hyperactivity/impulsivity. ADHD-IN = attention-deficit/hyperactivity disorder-inattention. All loadings significant at  $p < .001$  unless noted as ns (non-significant).

Table S3

*External Correlate Differences between Comparison (n=1,861), SCT only (n=53), ADHD-IN only (n=30), and ADHD-HI only (n=40) Groups*

| External Correlates              | 1. Comparison     |      | 2. SCT only        |      | 3. IN only         |      | 4. HI only         |      | F   | Contrasts          | Eta <sup>2</sup> |
|----------------------------------|-------------------|------|--------------------|------|--------------------|------|--------------------|------|-----|--------------------|------------------|
|                                  | M                 | SE   | M                  | SE   | M                  | SE   | M                  | SE   |     |                    |                  |
| Psychopathology Symptoms         |                   |      |                    |      |                    |      |                    |      |     |                    |                  |
| Oppositional defiant disorder    | 1.10 <sup>a</sup> | 0.02 | 2.15 <sup>b</sup>  | 0.18 | 2.68 <sup>c</sup>  | 0.26 | 3.33 <sup>d</sup>  | 0.20 | 92* | 1 < 2 < 3 < 4      | .14              |
| Anxiety                          | 0.78 <sup>a</sup> | 0.02 | 2.07 <sup>b</sup>  | 0.18 | 1.84 <sup>b</sup>  | 0.23 | 1.18 <sup>c</sup>  | 0.13 | 60* | 1 < 2, 3 < 4       | .09              |
| Depression                       | 0.45 <sup>a</sup> | 0.02 | 1.58 <sup>b</sup>  | 0.18 | 1.17 <sup>c</sup>  | 0.17 | 0.79 <sup>d</sup>  | 0.13 | 60* | 1 < 4 < 3 < 2      | .09              |
| Sleep                            |                   |      |                    |      |                    |      |                    |      |     |                    |                  |
| Sleep Difficulties               | 1.05 <sup>a</sup> | 0.01 | 1.66 <sup>b</sup>  | 0.10 | 1.26 <sup>a</sup>  | 0.12 | 1.20 <sup>a</sup>  | 0.10 | 19* | 1, 3, 4 < 2        | .03              |
| Social Functioning               |                   |      |                    |      |                    |      |                    |      |     |                    |                  |
| Conflicted Shyness               | 1.18 <sup>a</sup> | 0.02 | 1.93 <sup>b</sup>  | 0.10 | 1.58 <sup>c</sup>  | 0.19 | 1.12 <sup>a</sup>  | 0.13 | 16* | 1, 4 < 3 < 2       | .02              |
| Friendship difficulties          | 0.80 <sup>a</sup> | 0.02 | 1.87 <sup>b</sup>  | 0.14 | 1.68 <sup>bc</sup> | 0.23 | 1.50 <sup>c</sup>  | 0.18 | 43* | 1 < 4 < 2          | .07              |
| Number of friends                | 3.07 <sup>a</sup> | 0.03 | 2.09 <sup>bc</sup> | 0.20 | 2.63 <sup>ac</sup> | 0.31 | 2.15 <sup>bc</sup> | 0.22 | 14* | 1 > 2, 4           | .02              |
| Social impairment                | 2.10 <sup>a</sup> | 0.03 | 2.97 <sup>b</sup>  | 0.19 | 2.90 <sup>b</sup>  | 0.23 | 2.91 <sup>b</sup>  | 0.21 | 16* | 1 < 2, 3, 4        | .02              |
| Academics                        |                   |      |                    |      |                    |      |                    |      |     |                    |                  |
| Academic impairment              | 2.15 <sup>a</sup> | 0.03 | 3.23 <sup>b</sup>  | 0.19 | 3.86 <sup>b</sup>  | 0.25 | 3.17 <sup>b</sup>  | 0.22 | 27* | 1 < 2, 3, 4        | .04              |
| Daily Life Executive Functioning |                   |      |                    |      |                    |      |                    |      |     |                    |                  |
| Time management                  | 1.08 <sup>a</sup> | 0.02 | 1.99 <sup>b</sup>  | 0.10 | 2.52 <sup>c</sup>  | 0.12 | 2.17 <sup>bc</sup> | 0.12 | 75* | 1 < 2 < 3<br>1 < 4 | .11              |
| Self-organization                | 0.62 <sup>a</sup> | 0.02 | 1.88 <sup>b</sup>  | 0.11 | 1.60 <sup>bc</sup> | 0.14 | 1.50 <sup>c</sup>  | 0.13 | 89* | 1 < 2 < 4<br>1 < 3 | .13              |
| Self-restraint                   | 0.90 <sup>a</sup> | 0.02 | 1.73 <sup>b</sup>  | 0.12 | 2.09 <sup>c</sup>  | 0.15 | 2.54 <sup>d</sup>  | 0.09 | 90* | 1 < 2 < 3 < 4      | .14              |
| Self-motivation                  | 0.82 <sup>a</sup> | 0.02 | 1.68 <sup>b</sup>  | 0.11 | 2.12 <sup>c</sup>  | 0.13 | 1.75 <sup>b</sup>  | 0.12 | 65* | 1 < 2, 4 < 3       | .10              |
| Emotion regulation               | 0.83 <sup>a</sup> | 0.02 | 1.65 <sup>b</sup>  | 0.13 | 1.88 <sup>b</sup>  | 0.19 | 1.93 <sup>b</sup>  | 0.16 | 48* | 1 < 2, 3, 4        | .07              |

*Note.* Higher scores indicate greater impairment/poorer functioning with the exception of number of friends. Row means with different superscripts differ significantly at  $p < .05$ . A Bonferroni correction was not used for the six subsequent tests given the exploratory nature of these tests. ADHD = attention-deficit/hyperactivity disorder. SCT=sluggish cognitive tempo; IN=inattention; HI=hyperactivity/impulsivity.

Table S4

*Comparisons of Comparison (n=1,861), SCT (n=53), ADHD (n=93), and SCT+ADHD (n=49) Groups in the Percentages of Comorbid Disorders*

| Diagnosis                 | Comparison         | SCT                 | ADHD               | SCT+ADHD            | $\chi^2$            | CV  |
|---------------------------|--------------------|---------------------|--------------------|---------------------|---------------------|-----|
| ADD/ADHD                  | 10.3% <sup>a</sup> | 32.1% <sup>b</sup>  | 46.2% <sup>b</sup> | 46.9% <sup>b</sup>  | 166.8 <sup>**</sup> | .29 |
| ODD/CD                    | 1.7% <sup>a</sup>  | 3.8% <sup>ac</sup>  | 15.1% <sup>b</sup> | 10.2% <sup>bc</sup> | 76.8 <sup>**</sup>  | .19 |
| Any Anxiety Disorder      | 5.5% <sup>a</sup>  | 17.0% <sup>bc</sup> | 8.6% <sup>ac</sup> | 26.5% <sup>b</sup>  | 45.7 <sup>**</sup>  | .15 |
| Any Depression Disorder   | 1.8% <sup>a</sup>  | 7.6% <sup>bc</sup>  | 3.2% <sup>ac</sup> | 10.2% <sup>bc</sup> | 22.9 <sup>**</sup>  | .11 |
| Autism or Autism Spectrum | 3.7% <sup>a</sup>  | 12.3% <sup>b</sup>  | 10.2% <sup>b</sup> | 14.3% <sup>b</sup>  | 42.5 <sup>**</sup>  | .14 |
| Reading Disorder          | 2.0% <sup>a</sup>  | 1.9% <sup>ab</sup>  | 3.2% <sup>ab</sup> | 10.2% <sup>b</sup>  | 15.2 <sup>*</sup>   | .09 |
| Language Delay            | 3.3% <sup>a</sup>  | 7.6% <sup>ab</sup>  | 5.4% <sup>ab</sup> | 12.2% <sup>b</sup>  | 13.5 <sup>*</sup>   | .08 |

*Note.* Row means with different superscripts differ significantly at  $p < .05$ . CV = Cramer's V. ADD = attention-deficit disorder; ADHD=attention-deficit/hyperactivity disorder; ODD = oppositional defiant disorder; CD = conduct disorder.

\*\* $p < .001$ ; \* $p < .05$ .

Table S5

*Correlations of SCT, ADHD-IN, and ADHD-HI Factors with External Correlate Factors*

| External Correlates            | SCT               |           | ADHD-IN           |           | ADHD-HI           |           |
|--------------------------------|-------------------|-----------|-------------------|-----------|-------------------|-----------|
|                                | <i>r</i>          | <i>SE</i> | <i>r</i>          | <i>SE</i> | <i>r</i>          | <i>SE</i> |
| Oppositional defiant disorder  | .54 <sup>a</sup>  | .02       | .70 <sup>b</sup>  | .01       | .73 <sup>b</sup>  | .01       |
| Anxiety                        | .70 <sup>a</sup>  | .01       | .60 <sup>b</sup>  | .02       | .51 <sup>c</sup>  | .02       |
| Depression                     | .75 <sup>a</sup>  | .01       | .65 <sup>b</sup>  | .02       | .46 <sup>c</sup>  | .02       |
| Sleep difficulties             | .51 <sup>a</sup>  | .02       | .44 <sup>b</sup>  | .02       | .30 <sup>c</sup>  | .02       |
| Conflicted Shyness             | .44 <sup>a</sup>  | .02       | .33 <sup>b</sup>  | .02       | .16 <sup>c</sup>  | .02       |
| Friendship difficulties        | .57 <sup>a</sup>  | .02       | .57 <sup>a</sup>  | .02       | .42 <sup>b</sup>  | .02       |
| Number of friends <sup>1</sup> | -.43 <sup>a</sup> | .03       | -.46 <sup>a</sup> | .03       | -.31 <sup>b</sup> | .03       |
| Social impairment              | .39 <sup>a</sup>  | .02       | .46 <sup>b</sup>  | .02       | .34 <sup>a</sup>  | .02       |
| Time management                | .59 <sup>a</sup>  | .02       | .80 <sup>b</sup>  | .01       | .55 <sup>a</sup>  | .02       |
| Self-organization              | .72 <sup>a</sup>  | .01       | .71 <sup>a</sup>  | .01       | .53 <sup>b</sup>  | .02       |
| Self-restraint                 | .54 <sup>a</sup>  | .02       | .70 <sup>b</sup>  | .01       | .70 <sup>b</sup>  | .01       |
| Self-motivation                | .60 <sup>a</sup>  | .02       | .79 <sup>b</sup>  | .01       | .52 <sup>c</sup>  | .02       |
| Emotion regulation             | .52 <sup>a</sup>  | .02       | .64 <sup>bc</sup> | .02       | .57 <sup>ac</sup> | .02       |
| Academic impairment            | .42 <sup>a</sup>  | .02       | .58 <sup>b</sup>  | .02       | .36 <sup>a</sup>  | .02       |

*Note.* All correlations were significant at  $p < .001$ . Row correlations with different superscripts differ at  $p < .001$ . ADHD = attention-deficit/hyperactivity disorder; IN = inattention; SCT = sluggish cognitive tempo; HI = hyperactivity/impulsivity.

<sup>1</sup>Number of friends was a single item. All other external correlates were latent variables defined by manifest variables.

Table S6

*Associations (d Values and Correlations) of SCT, ADHD-IN and ADHD-HI Factors with Child and Mother Demographic Characteristics*

|                                    | SCT                |           | ADHD-IN            |           | ADHD-HI            |           |
|------------------------------------|--------------------|-----------|--------------------|-----------|--------------------|-----------|
|                                    | <i>d/r</i>         | <i>SE</i> | <i>d/r</i>         | <i>SE</i> | <i>d/r</i>         | <i>SE</i> |
| <b>Child Characteristics</b>       |                    |           |                    |           |                    |           |
| White [1] vs. Non-White [0])       | .00 <sup>ns</sup>  | .01       | .03 <sup>ns</sup>  | .01       | .02 <sup>ns</sup>  | .01       |
| Hispanic [1] vs. Non-Hispanic [0]) | .00 <sup>ns</sup>  | .01       | -.02 <sup>ns</sup> | .01       | -.01 <sup>ns</sup> | .01       |
| One Parent [1] vs. Two Parent [0]  | .00 <sup>ns</sup>  | .01       | .03 <sup>ns</sup>  | .01       | .03 <sup>ns</sup>  | .01       |
| Child's age                        | .09 <sup>*</sup>   | .02       | .05 <sup>ns</sup>  | .02       | -.12 <sup>*</sup>  | .02       |
| <b>Mother Characteristics</b>      |                    |           |                    |           |                    |           |
| Family Income                      | -.08 <sup>*</sup>  | .02       | -.10 <sup>*</sup>  | .02       | -.12 <sup>*</sup>  | .02       |
| Mother's Education                 | -.07 <sup>ns</sup> | .02       | -.07 <sup>ns</sup> | .02       | -.12 <sup>*</sup>  | .02       |
| Mother's Age                       | -.11 <sup>*</sup>  | .02       | -.10 <sup>*</sup>  | .02       | -.14 <sup>*</sup>  | .02       |

*Note.*  $N = 2056$ . The values for White, Hispanic, and two parents are *d* values while the values for child's age, family income, mother's education, and mother's age are correlations.

<sup>\*</sup> $p < .001$ . <sup>ns</sup> $p > .001$ .
